# Supplementary material for: Highly efficient visible-light-driven photoelectro-catalytic selective aerobic oxidation of biomass alcohols to aldehydes
Source: Royal Society of Chemistry journal article supplement (doi:10.1039/c4gc00454j), 2014-01-01
Supplement: c4gc00454j1.pdf [file c4gc00454j1.pdf]

## Supplementary Information

### Highly efficient visible-light-driven photoelectrocatalytic selective aerobic oxidation of biomass alcohols to aldehydes

Yajun Zhang, Guohua Zhao\*, Yanan Zhang, Xiaofeng Huang

Department of Chemistry, Key Laboratory of Yangtze River Water Environment,  
Tongji University, Shanghai 200092, People's Republic of China

\*Corresponding Author: *Phone:* (86)-21-65988570-8244. *Fax:* (86)-21-65982287 .

*E-mail:* [g.zhao@mail.tongji.edu.cn](mailto:g.zhao@mail.tongji.edu.cn).

### **Preparation of TiO<sub>2</sub> NTs**

Highly ordered TiO<sub>2</sub> NTs were prepared by electrochemical anodic oxidation of Ti sheets in a two-electrode cell according to the literature.<sup>33</sup> Ti sheets were pretreated by mechanical polishing and ultrasonic washing in twice-distilled water and acetone, respectively. During the anodization process, pretreated Ti sheet was anodized at the applied voltage of 60 V with Pt foil serving as the counter electrode for 2 h at 25 °C. The electrolyte consisted of 0.3 wt % NH<sub>4</sub>F and 2.0 vol % H<sub>2</sub>O in ethylene glycol. Then, the anodized TiO<sub>2</sub> NTs samples were rinsed with water and ethanol successively and were dried at 50 °C for subsequent use.

### **Preparation of Au ( $\lambda_{534\text{nm}}$ )/CeO<sub>2</sub>/Ti photocathode**

Ti sheets were pretreated by mechanical polishing and ultrasonic washing in twice-distilled water and acetone, respectively. Prior to electrodeposition, the Ti sheets were immersed in the deposition solution (0.1 mol L<sup>-1</sup> CeCl<sub>3</sub> ethanol solution) for 1 h. The electrodeposition quality of CeO<sub>2</sub> onto the Ti substrate was the same as the deposition of CeO<sub>2</sub> onto the TiO<sub>2</sub> NTs (about 1.6943 g m<sup>-2</sup>), and the electrodeposition time was about 18s, and then the preparation of Au nanoparticle on the CeO<sub>2</sub>/Ti substrate electrode was also via the photocatalytic reduction method, the Au ( $\lambda_{534\text{nm}}$ )/CeO<sub>2</sub>/Ti photocathode material was obtained.

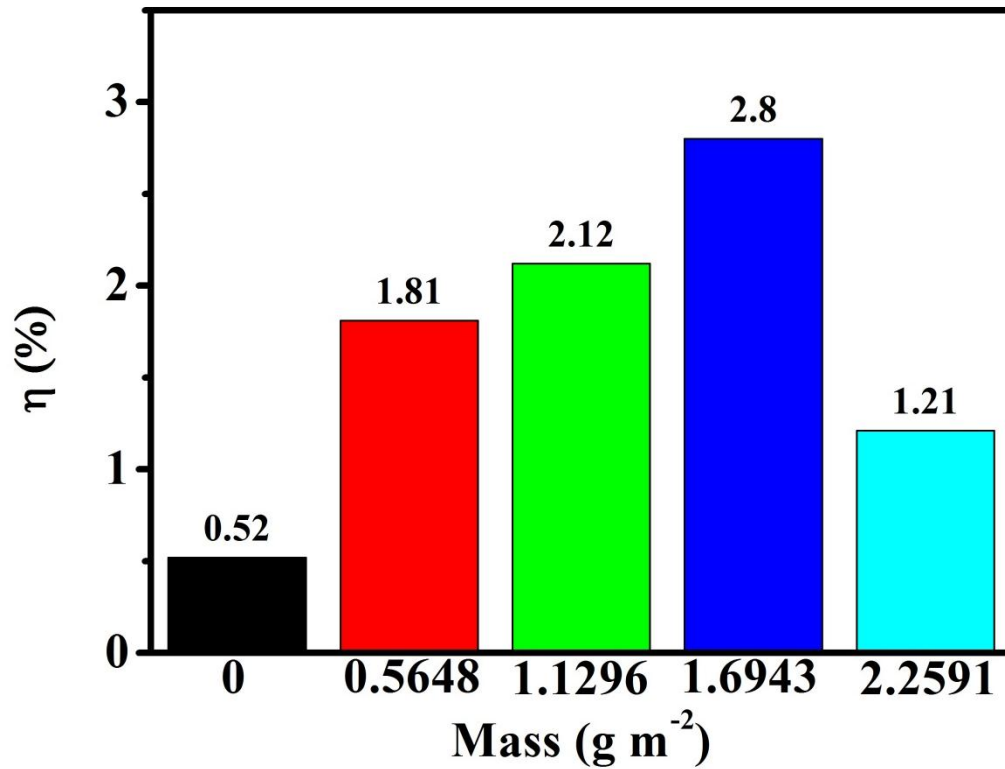

**SI-Fig.1** PCE of  $\text{CeO}_2\text{-TiO}_2$  NTs as a function of the amount of  $\text{CeO}_2$  NPs loaded on the  $\text{TiO}_2$  NTs substrate electrode.  $\text{CeO}_2\text{-TiO}_2$  NTs electrodes were used as photocathode and the measurement was conducted in  $0.1\text{mol L}^{-1}$   $\text{Na}_2\text{SO}_4$  solution under the visible light irradiation.

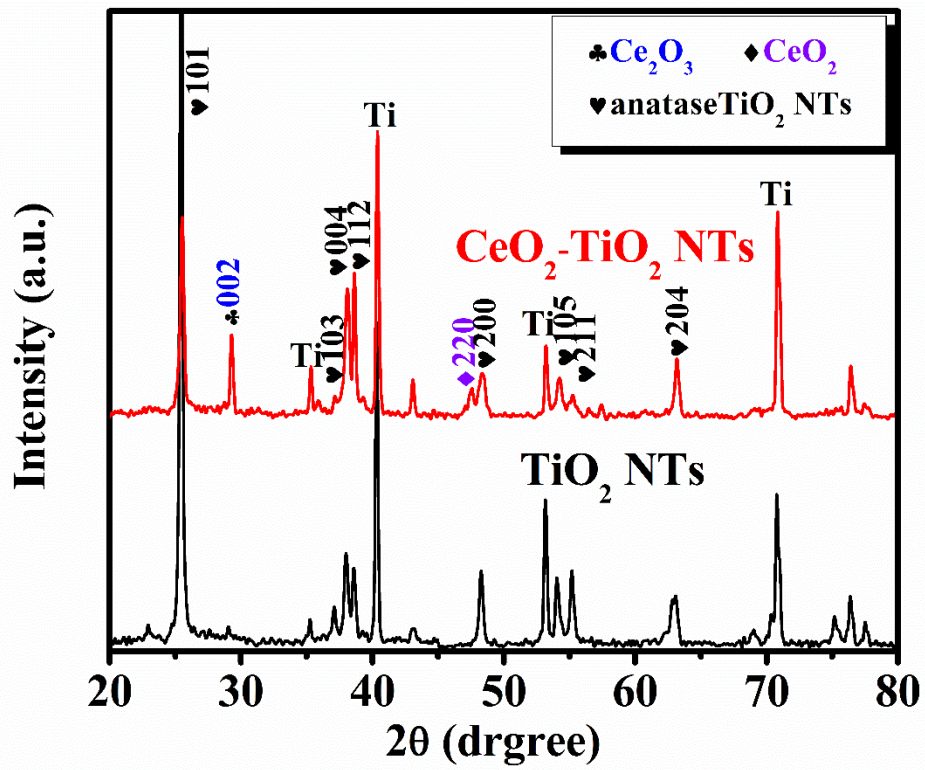

SI-Fig.2 XRD patterns of pure TiO<sub>2</sub> NTs and CeO<sub>2</sub>-TiO<sub>2</sub> NTs.

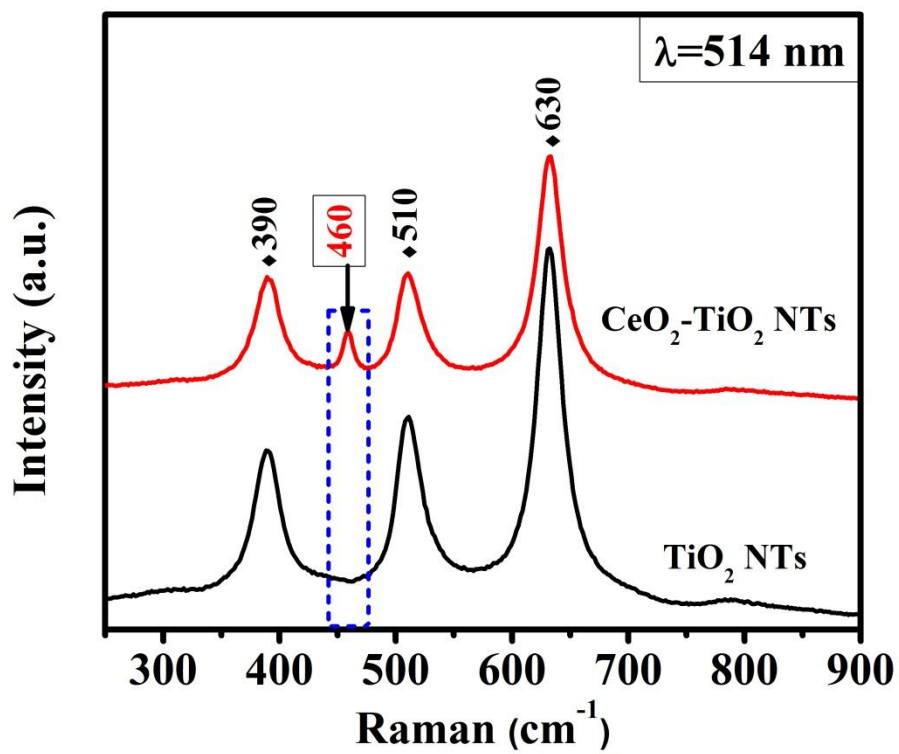

SI-Fig.3 Raman scattering spectra of pure  $\text{TiO}_2$  NTs and  $\text{CeO}_2\text{-TiO}_2$  NTs.

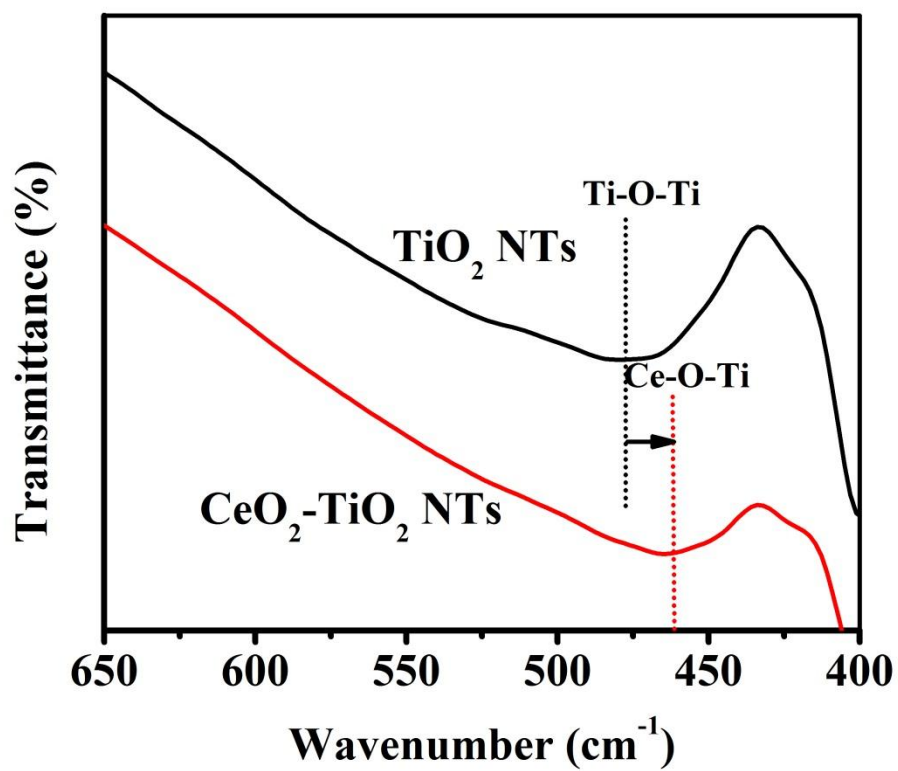

SI-Fig.4 FT-IR spectra of pure  $\text{TiO}_2$  NTs and  $\text{CeO}_2$ - $\text{TiO}_2$  NTs.

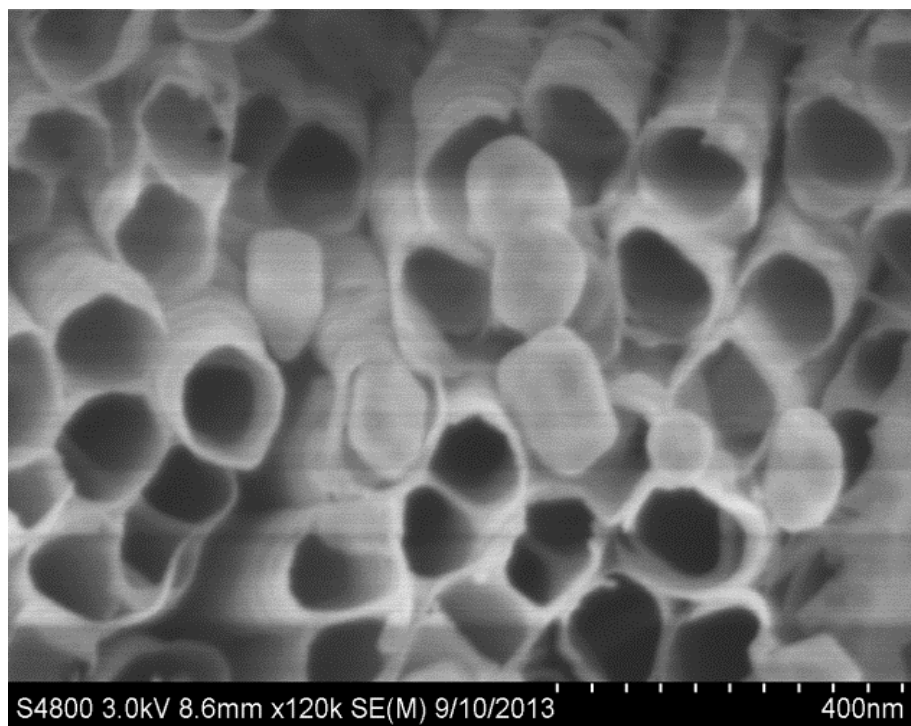

**SI-Fig.5** SEM image of Au ( $\lambda_{480\text{ nm}}$ )/CeO<sub>2</sub>-TiO<sub>2</sub> NTs electrode.

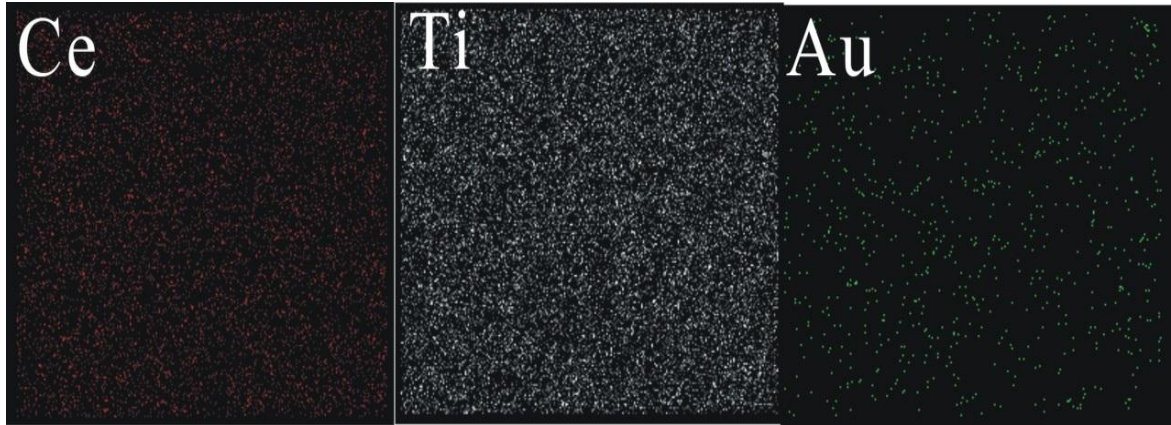

**SI-Fig.6** The elemental mapping for the debris of Au ( $\lambda_{534\text{ nm}}$ )/  
CeO<sub>2</sub>-TiO<sub>2</sub> NTs



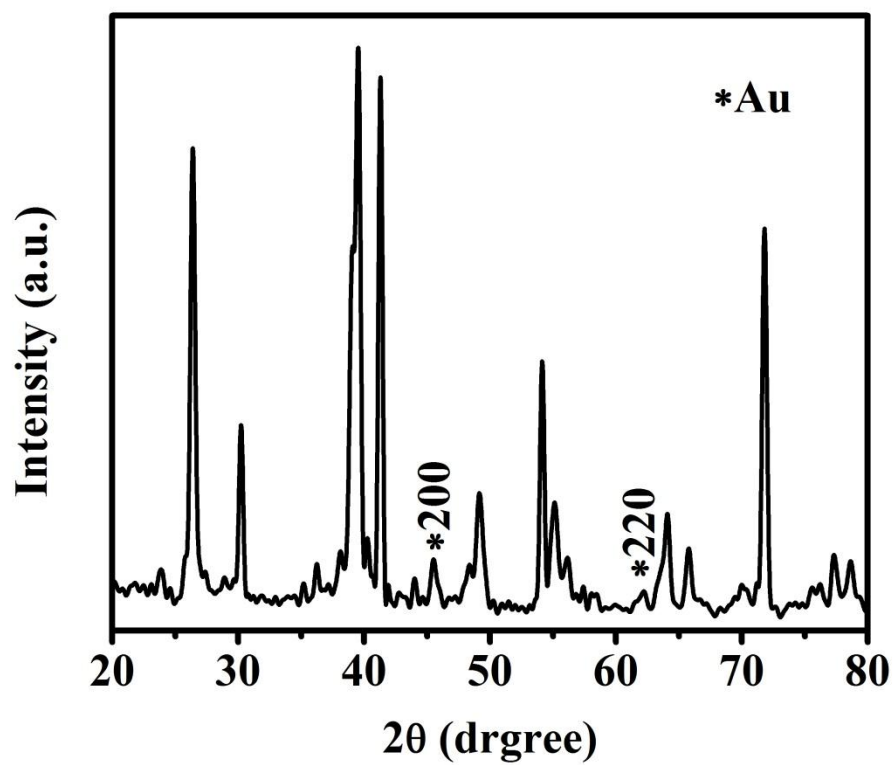

SI-Fig.7 XRD pattern of Au/CeO<sub>2</sub>-TiO<sub>2</sub> NTs electrode.
